# Supplementary material
Source: PubMed Central journal article supplement (PMC3347136)
Supplement: supp_50.5.1626_JCM-JCM06697-11-s01.pdf [file supp_50.5.1626_JCM-JCM06697-11-s01.pdf]

**Supplementary table 1.** Primers and conditions used for amplification of superantigen genes

| Gene        | Forward primer (5' - 3')  | Reverse primer (5' - 3')  | Amplicon size (bp) | Annealing temp (°C) | Reference  |
|-------------|---------------------------|---------------------------|--------------------|---------------------|------------|
| <i>speA</i> | ATGGAAAACAATAAAAAAGTATTG  | TTACTTGGTTGTTAGGTAGACTTC  | 756                | 52                  | (1)        |
| <i>speC</i> | AATTTCGATTCTGCCGCTTA      | GCAGGGTAAATTTTTCAACGAC    | 400                | 52                  | this study |
| <i>speG</i> | TCATGTGTTTTTAGCTATGGAAGTC | ACTGTCTCGACTTAAAAGCTTATCA | 590                | 52                  | this study |
| <i>speH</i> | AGATTGGATATCACAGG         | CTATTCTCTCGTTATTGG        | 416                | 52                  | (2)        |
| <i>speI</i> | AATGAAGGTCCGCCATTTTC      | TCTCTCTGTCACCATGTCCTG     | 516                | 52                  | (3)        |
| <i>speJ</i> | GATAGTGAAAATATTAAGACG     | TTATTTAGTCCAAAGGTAAATATC  | 630                | 52                  | (4)        |
| <i>speK</i> | GTGTGTCTAATGCCACCGTCT     | GGAACATATATGCTCCTAGAT     | 564                | 52                  | (3)        |
| <i>speL</i> | CAGCACCTTCCTCTTTCTCG      | GGAAAAGAGGGACGCAAG        | 459                | 52                  | (3)        |
| <i>speM</i> | GGATGAGTGAATAAATCGGTAAAC  | AGTCTGGGACGATGATAA        | 425                | 55                  | (3)        |
| <i>smeZ</i> | CTTCAATATTCATTGCAATAATTC  | TGTAACTGTTGTTTTGTTAGTTGAT | 430                | 52                  | this study |
| <i>ssa</i>  | TGATCAAATATTGCTCCAGGTG    | TCCACAGGTCAGCTTTTACAG     | 502                | 52                  | (3)        |

**References:**

1. Eriksson BK, Andersson J, Holm SE, Norgren M. Invasive group A streptococcal infections: T1M1 isolates expressing pyrogenic exotoxins A and B in combination with selective lack of toxin-neutralizing antibodies are associated with increased risk of streptococcal toxic shock syndrome. *J Infect Dis.* 1999 Aug;180(2):410-8.
2. Schmitz FJ, Beyer A, Charpentier E, Normark BH, Schade M, Fluit AC, et al. Toxin-gene profile heterogeneity among endemic invasive European group A streptococcal isolates. *J Infect Dis.* 2003 Nov 15;188(10):1578-86.
3. Green NM, Beres SB, Graviss EA, Allison JE, McGeer AJ, Vuopio-Varkila J, et al. Genetic diversity among type emm28 group A *Streptococcus* strains causing invasive infections and pharyngitis. *J Clin Microbiol.* 2005 Aug;43(8):4083-91.
4. Rivera A, Rebollo M, Miro E, Mateo M, Navarro F, Gurgui M, et al. Superantigen gene profile, *emm* type and antibiotic resistance genes among group A streptococcal isolates from Barcelona, Spain. *J Med Microbiol.* 2006 Aug;55(Pt 8):1115-23.
